# Supplementary material
Source: PubMed Central journal article supplement (PMC3100931)
Supplement: 1019496108_pnas.201019496SI.pdf [file 1019496108_pnas.201019496SI.pdf]

# Supporting Information

Walker et al. 10.1073/pnas.1019496108

## SI Materials and Methods

**Preparation of Membranes and Biochemical Analysis.** REV-transformed cells were cultured in RPMI 1640 (supplemented with glutamine, kanamycin, and 10% FCS) at 37 °C and at 5% CO<sub>2</sub>. Cells were spun down and resuspended in 1 mL cold freeze–thaw buffer (1 mM MgCl<sub>2</sub>, 10 mM TrisCl, pH 8), frozen and thawed twice, and centrifuged at 13,300 rpm at 4 °C for 1 h in a Haereus Fresco 17 microfuge (Thermo Scientific). The pellet was solubilized on ice for 30 min in digitonin lysis buffer [150 mM NaCl, 1 mM MgCl<sub>2</sub>, 10 mM TrisCl, pH 8, with 1% digitonin (Calbiochem) and the serine protease inhibitor AEBSF (Pefabloc; Roche)] to give 10<sup>8</sup> cell equivalents per milliliter, and centrifuged at 13,300 rpm at 4 °C for 10 min in a Haereus Fresco 17 microfuge, and the supernatant was used immediately or frozen in aliquots.

For Fig. S1, aliquots corresponding to 5 × 10<sup>5</sup> REV-transformed IS19 cells were prepared as cell pellets, detergent lysates of a membrane pellet, and the supernatant containing the solu-

ble material not spinning down as membranes. The three samples were heated to 95 °C for 5 min with SDS sample buffer (2% SDS, 50 mM TrisCl, pH 8, 5% glycerol, 0.1% bromophenol blue) and then SDS gel electrophoresis followed by staining with Coomassie Brilliant Blue in 10% methanol, 7.5% acetic acid, and by Western blot with the mAb 2G11 to chicken class II β-chain were performed as described in *Materials and Methods*.

For Fig. S2, aliquots of digitonin lysate from membranes were incubated with ATP-agarose (Sigma) in cold digitonin IP wash buffer (1 vol digitonin lysis buffer: 9 vol 150 mM NaCl, 50 mM TrisCl, pH 8) supplemented with 5 mM MgCl<sub>2</sub> overnight on ice (with or without 25 mM ATP), then washed three times with the same buffer. The affinity-purified molecules were heated to 95 °C for 5 min with SDS sample buffer, and then SDS gel electrophoresis followed by Western blot with mAbs were performed as described in *Materials and Methods*.

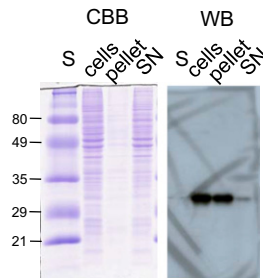

**Fig. S1.** A simple protocol separates membrane proteins from most other proteins. Chicken TAP proteins from REV-transformed cells were not detected until sufficient cell equivalents were used in the Western blot. This experiment shows that most proteins as detected by Coomassie Brilliant Blue (CBB) staining were found in the supernatant (SN) of a membrane preparation, whereas a typical membrane protein as detected by Western blot (WB) was found in the membrane pellet and supernatant by using a microcentrifuge (*Materials and Methods*). The cells and the membrane pellet were solubilized with detergent and subcellular material was removed by centrifugation (*Materials and Methods*). Samples representing equivalent numbers of cells were analyzed by SDS gel electrophoresis, with the gels either stained with CBB in 10% methanol, 7.5% acetic acid (*Left*), or Western blotted (*Materials and Methods*) with 2G11, an mAb to chicken class II β-chains (*Right*). S, standards (apparent molecule mass indicated in kDa).



**Table S1. Polymorphic residues in chicken TAP1 membrane-spanning domain**

|     | 3 | 54 | 92 | 116 | 131 | 162 | 179 | 289 | 327 |
|-----|---|----|----|-----|-----|-----|-----|-----|-----|
| B2  | T | E  | R  | M   | E   | V   | R   | R   | A   |
| B4  | T | K  | R  | M   | K   | A   | R   | R   | A   |
| B12 | K | E  | R  | M   | E   | A   | R   | E   | A   |
| B14 | T | E  | H  | M   | E   | A   | R   | E   | A   |
| B15 | T | E  | R  | T   | E   | A   | Q   | E   | A   |
| B19 | K | E  | R  | M   | E   | A   | R   | E   | A   |
| B21 | T | E  | R  | M   | E   | A   | R   | R   | T   |

In Tables S1–S5, MHC haplotypes are from the following lines at the Basel Institute for Immunology and the Institute for Animal Health (Compton, UK): B2 haplotype, lines H.B2, 6, and 7<sub>2</sub>; B4, CC and C-B4; B12, CB and C-B12; B14, H.B14 and WL; B15, H.B15 and 15I; B19, H.B19 and P2a; B21, H.B21, N and O. Basel and Compton lines were sequenced at the genomic level, and Compton lines at cDNA level as well.

**Table S2. Polymorphic residues in chicken TAP1 nucleotide-binding domain**

|     | 437 | 446 | 455 | 487 | 537 | C-terminus   |
|-----|-----|-----|-----|-----|-----|--------------|
| B2  | R   | R   | R   | R   | Q   | SGGEG        |
| B4  | R   | R   | R   | R   | Q   | SGGEG        |
| B12 | R   | Q   | R   | R   | E   | IAGVMDGEGRGW |
| B14 | R   | R   | L   | Q   | Q   | SGGEG        |
| B15 | R   | R   | R   | R   | Q   | SGGEG        |
| B19 | R   | Q   | R   | R   | E   | IAGVMDGEGRGW |
| B21 | W   | R   | R   | R   | Q   | SGGEG        |

**Table S3. Polymorphic residues in chicken TAP2 tapasin-binding domain**

|     | 9 | 37 | 64 |
|-----|---|----|----|
| B2  | R | W  | H  |
| B4  | R | W  | R  |
| B12 | R | W  | R  |
| B14 | H | W  | H  |

**Table S4. Polymorphic residues in chicken TAP2 membrane-spanning domain**

|     | 216 | 220 | 248 | 263 | 325 | 351 | 378 | 398 | 406 | 416 | 436 | 446 | 450 |
|-----|-----|-----|-----|-----|-----|-----|-----|-----|-----|-----|-----|-----|-----|
| B2  | R   | I   | A   | A   | D   | H   | R   | R   | S   | K   | A   | N   | A   |
| B4  | R   | V   | A   | A   | D   | H   | Q   | R   | S   | K   | V   | D   | P   |
| B12 | R   | I   | A   | A   | D   | H   | Q   | H   | G   | K   | A   | N   | A   |
| B14 | G   | V   | A   | T   | D   | H   | Q   | R   | S   | N   | A   | D   | A   |
| B15 | G   | V   | S   | T   | D   | H   | Q   | R   | S   | N   | A   | D   | A   |
| B19 | R   | I   | A   | A   | D   | H   | Q   | H   | G   | K   | A   | N   | A   |
| B21 | R   | V   | A   | A   | N   | Y   | Q   | R   | S   | K   | V   | D   | A   |

**Table S5. Polymorphic residues in chicken TAP2 nucleotide-binding domain**

|     | 458 | 466 | 478 | 494 | 570 | 579 | 622 | 671 |
|-----|-----|-----|-----|-----|-----|-----|-----|-----|
| B2  | V   | V   | R   | G   | E   | R   | H   | I   |
| B4  | V   | I   | R   | S   | E   | R   | R   | V   |
| B12 | V   | V   | R   | G   | E   | R   | H   | I   |
| B14 | M   | I   | R   | G   | K   | R   | H   | I   |
| B15 | M   | I   | R   | G   | E   | R   | R   | I   |
| B19 | V   | V   | C   | G   | K   | R   | R   | V   |
| B21 | V   | V   | R   | G   | E   | K   | R   | V   |
